# Supplementary material for: A stochastic and dynamical view of pluripotency in mouse embryonic stem cells
Source: PubMed Central journal article supplement (PMC5833290; doi:10.1371/journal.pcbi.1006000), 2018-02-16

**LIF+2i****LIF****2i****None****Fast switching**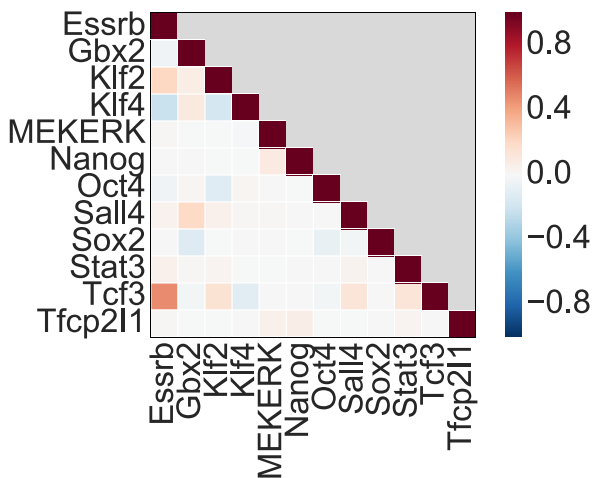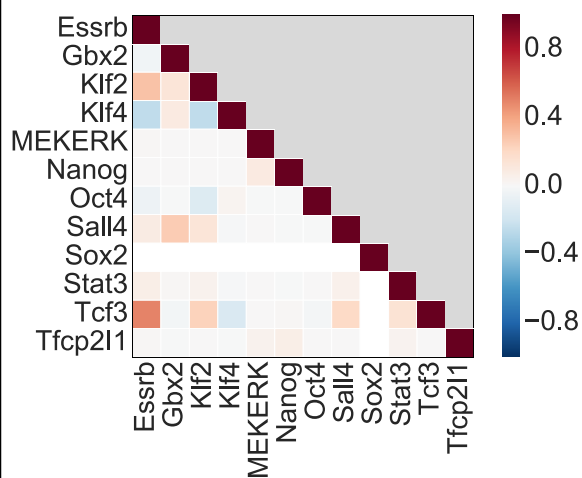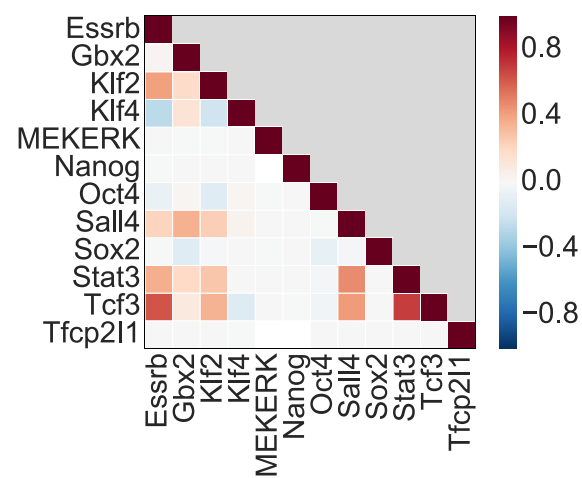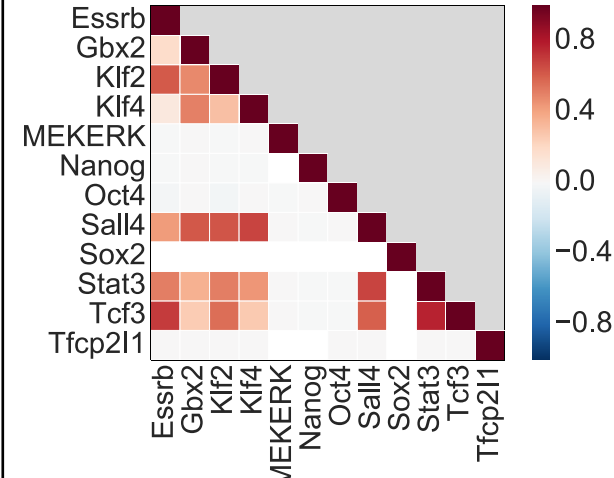**Intermediate switching**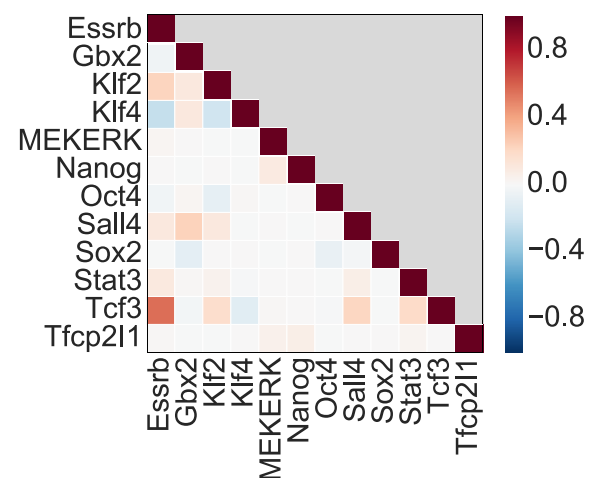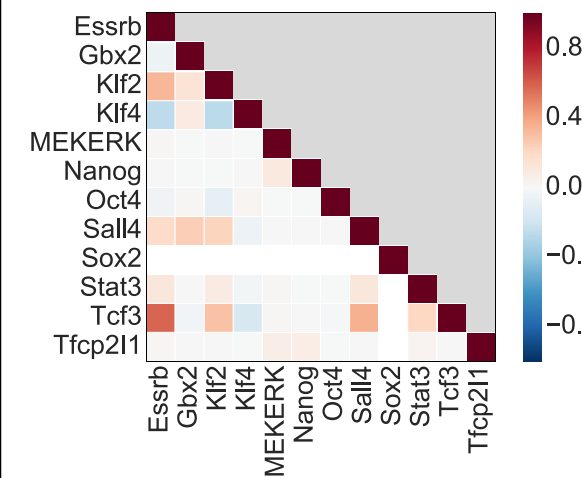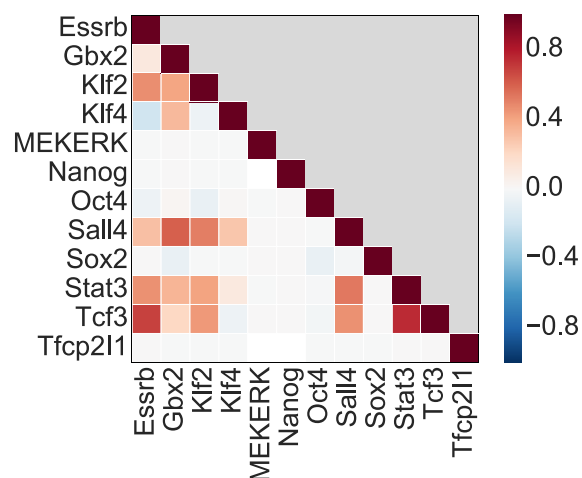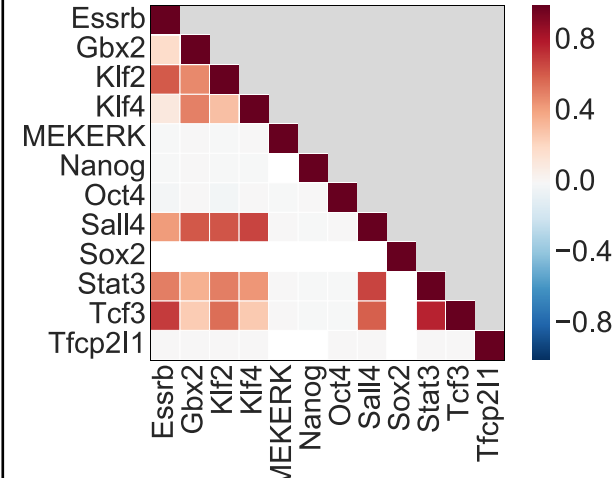**Slow switching**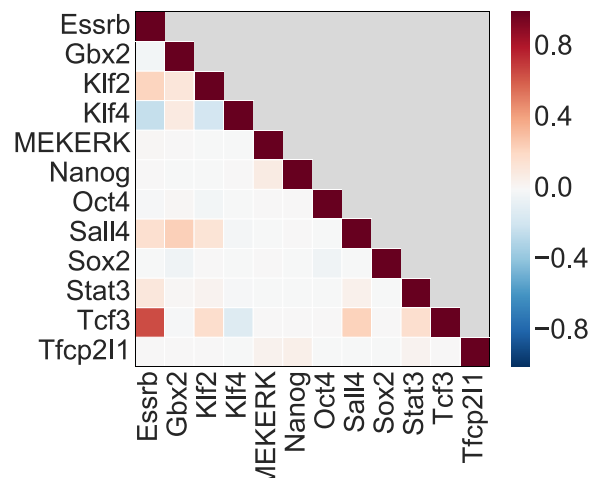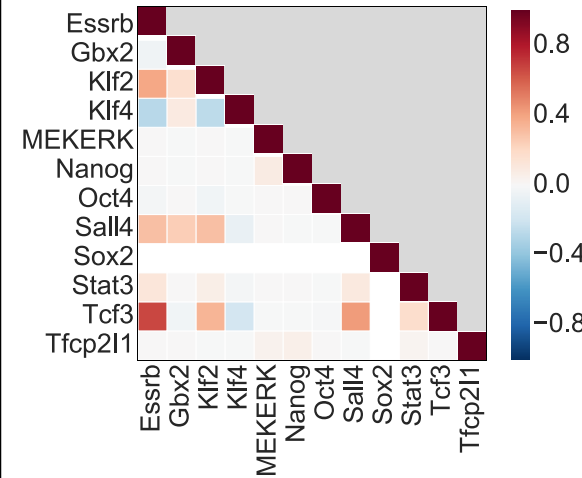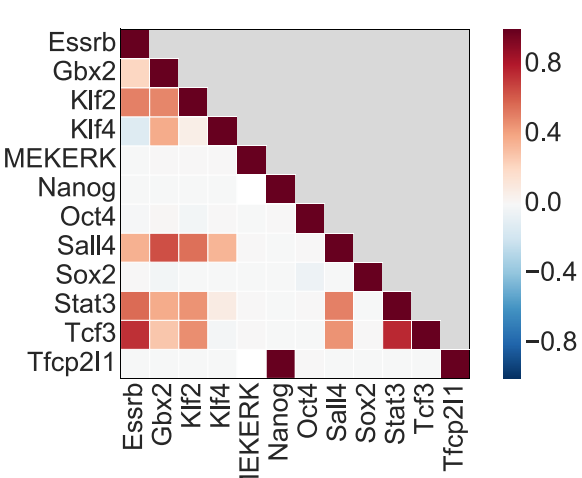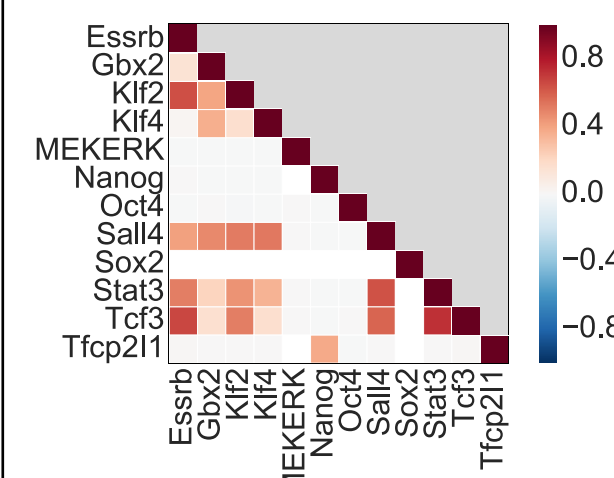

Supplement: pcbi.1006000.s005.pdf [file pcbi.1006000.s005.pdf]
